# Supplementary material for: New supramolecular interactions for electrochemical sensors development: different cucurbit[8]uril sensing platform designs
Source: Royal Society of Chemistry journal article supplement (doi:10.1039/c2an35325c), 2012-01-01
Supplement: c2an35325c.pdf [file c2an35325c.pdf]

Supplementary information

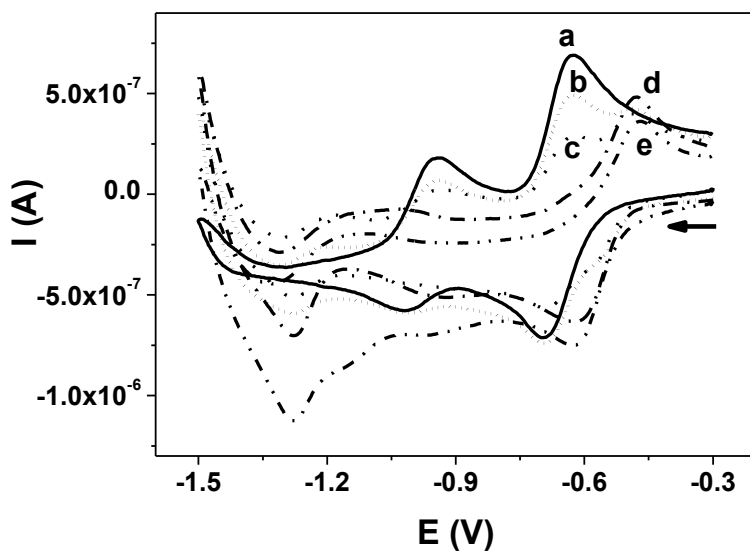

S1. Cyclic voltammograms obtained from  $1.0 \times 10^{-3}$  M  $MV^{2+}$  solutions with increasing CB[8] amounts.  $V_b = 100$  mV/s. 0.1 M NaCl. (a)  $MV^{2+}$ , (b)  $MV^{2+} + 2.5 \times 10^{-4}$  M CB[8], (c)  $MV^{2+} + 5.0 \times 10^{-4}$  M CB[8], (d)  $MV^{2+} + 1.0 \times 10^{-3}$  M CB[8] and (e)  $MV^{2+} + 2.0 \times 10^{-3}$  M CB[8].

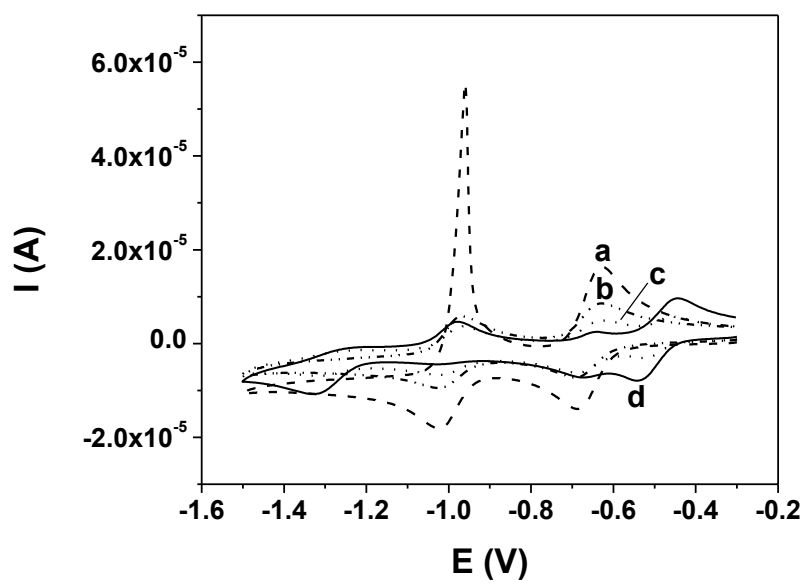

S2. Cyclic voltammograms of  $MV^{2+}$  solutions with the bare GC electrode (a) and GC electrode modified with dialysis membrane (b) and the dialysis membrane/CB[8] (c and d).

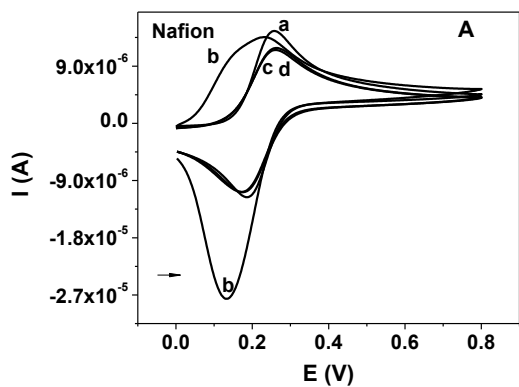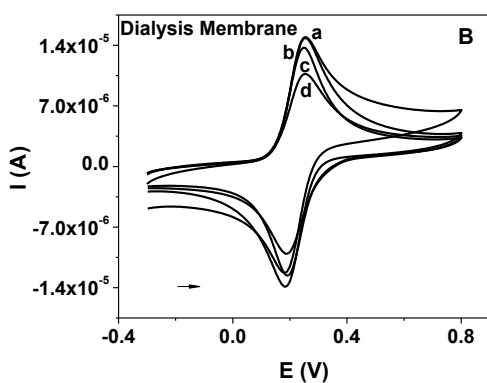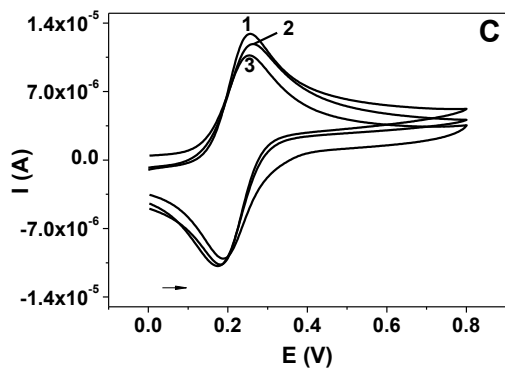

S3. Cyclic voltammograms of FcOH solutions with (A) GC electrodes modified with Nafion/CB[8], (B) dialysis membrane/CB[8], (a) bare electrode, (b) Substrate, (c) Substrate /0.30 % CB[8] and (d) Substrate /0.50% CB[8]. (C) Comparative results from different modified electrodes. 1) GC/0.10 % PVC + 0.5 % CB[8], (2) GC/ 0.10 % Nafion + 0.50 % CB[8], (3) GC/dialysis membrane + 0.50 % CB[8].
